# Supplementary material for: Polyaniline/(Ta2O5–SnO2) hybrid nanocomposite for efficient room temperature CO gas sensing
Source: Royal Society of Chemistry journal article supplement (doi:10.1039/d2ra00602b), 2022-01-01
Supplement: d2ra00602b1.pdf [file d2ra00602b1.pdf]

## Electronic Supporting Information

### **Polyaniline/(Ta<sub>2</sub>O<sub>5</sub>-SnO<sub>2</sub>) Hybrid Nanocomposite for Efficient Room Temperature CO Gas Sensing**

Chethana Aranthady,<sup>a,b</sup> Ganapati V. Shanbhag,<sup>a</sup> Nalini G Sundaram<sup>a,c\*</sup>

<sup>a</sup> *Materials Science and Catalysis Division, Poornaprajna Institute of Scientific Research, Devanahalli-562164, Bengaluru, India*

<sup>b</sup> *Graduate Studies, Manipal Academy of Higher Education, Manipal - 576104, Karnataka, India.*

<sup>c</sup> *Department of Chemistry, St. Josephs's Colleges (Autonomous), Bengaluru-560027, India*

*\*Corresponding author: [nalini@poornaprajna.org](mailto:nalini@poornaprajna.org)*

**Table S1: Dynamic range of sense (maximum and minimum CO gas response) for each composition at different operating temperatures.**

| <b>Composition</b> | <b>Operating temp. (°C)</b> | <b>% response</b> | <b>Response time (s)</b> | <b>Recovery time (s)</b> |
|--------------------|-----------------------------|-------------------|--------------------------|--------------------------|
| TaSn:PANI(1:0.25)  | <b>RRTT</b>                 | 4.7               | 15                       | 13                       |
|                    | 50                          | 4.2               | 15                       | 12                       |
|                    | 75                          | 4.1               | 16                       | 14                       |
|                    | 100                         | 2.3               | 13                       | 15                       |
|                    | 125                         | 0.09              | 16                       | 18                       |
|                    | 150                         | No response       | -                        | -                        |
| TaSn:PANI(1:0.50)  | <b>RRTT</b>                 | 5.2               | 14                       | 13                       |
|                    | 50                          | 4.6               | 18                       | 15                       |
|                    | 75                          | 4.2               | 15                       | 14                       |
|                    | 100                         | 2.9               | 13                       | 16                       |
|                    | 125                         | 1.5               | 14                       | 15                       |
|                    | 150                         | No response       | -                        | -                        |
| TaSn:PANI(1:0.75)  | <b>RRTT</b>                 | 3.8               | 22                       | 20                       |
|                    | 50                          | 3.5               | 23                       | 22                       |
|                    | 75                          | 2.3               | 20                       | 24                       |
|                    | 100                         | 1.8               | 22                       | 21                       |
|                    | 125                         | No response       | -                        | -                        |
|                    | 150                         | No response       | -                        | -                        |

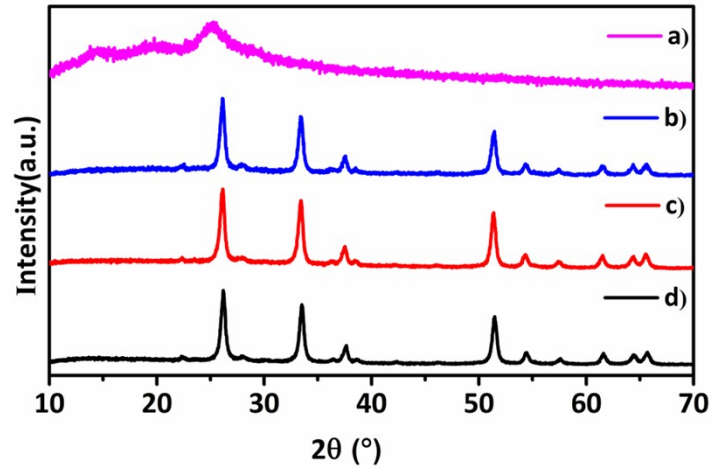

**Figure S1: p-XRD patterns of a) PANI, b) TaSn:PANI (1:0.75), c) TaSn:PANI (1:0.25), d) ( $\text{Ta}_2\text{O}_5\text{-SnO}_2$ ).**

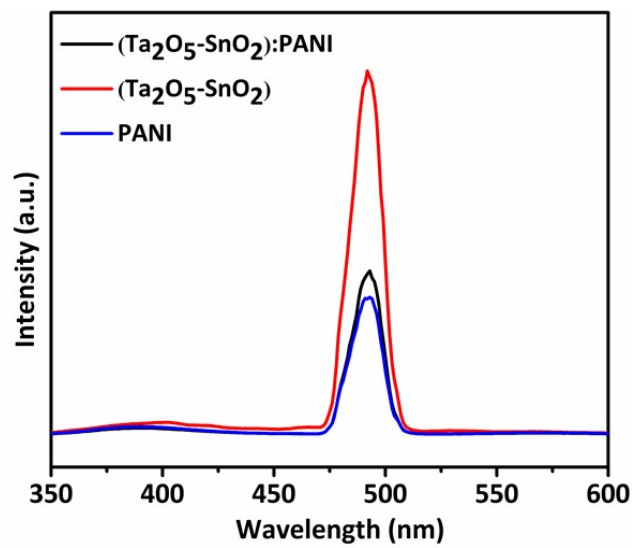

**Figure S2: PL emission spectra of hybrid TaSn:PANI (1:0.50), PANI and (Ta<sub>2</sub>O<sub>5</sub>-SnO<sub>2</sub>).**

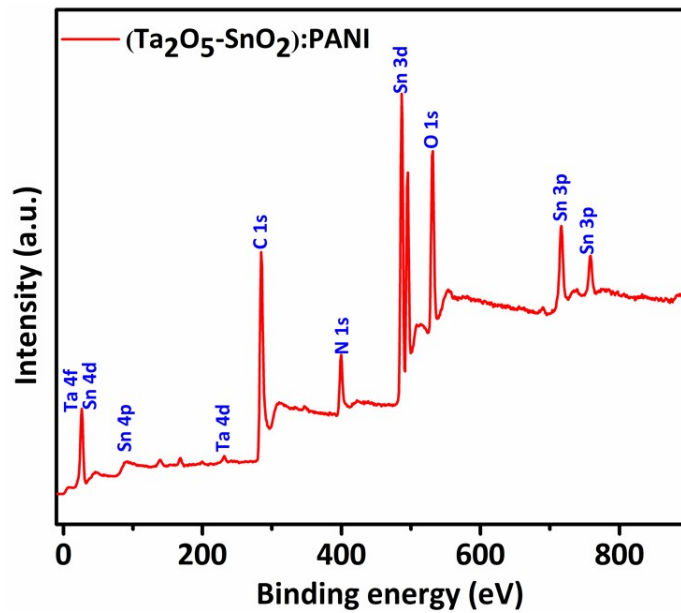

Figure S3: XPS survey spectra of hybrid TaSn:PANI (1:0.50) composite.

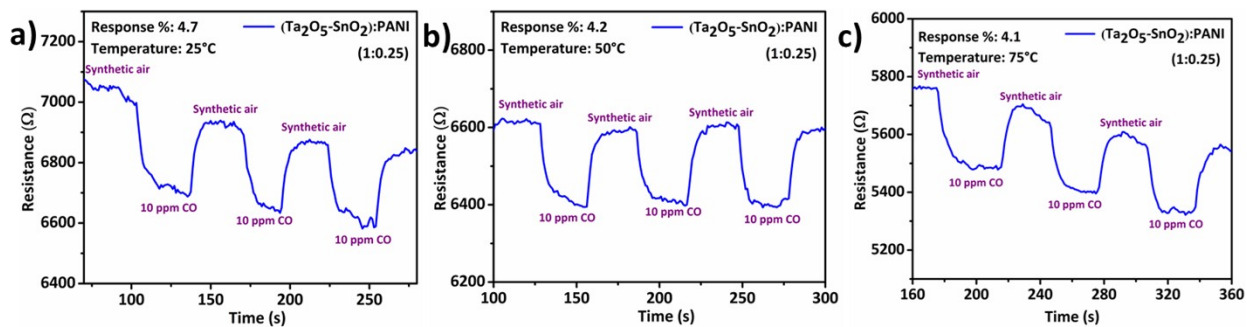

**Figure S4: Gas sensing results of TaSn:PANI (1:0.25) nano composite for the detection of 10 ppm CO gas at a) RT °C, b) 50 °C, c) 75 °C.**

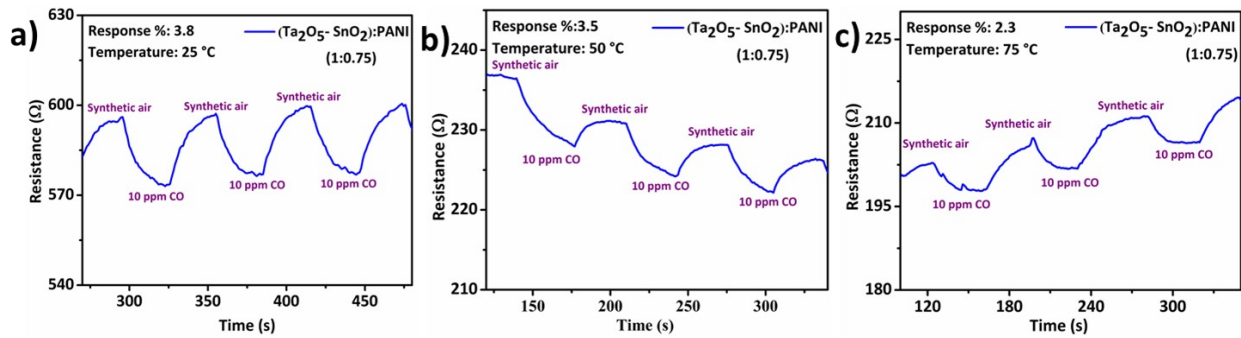

**Figure S5: Gas sensing results of TaSn:PANI (1:0.75) hybrid nanocomposite for the detection of 10 ppm CO gas at a) RT °C, b) 50 °C, c) 75 °C.**

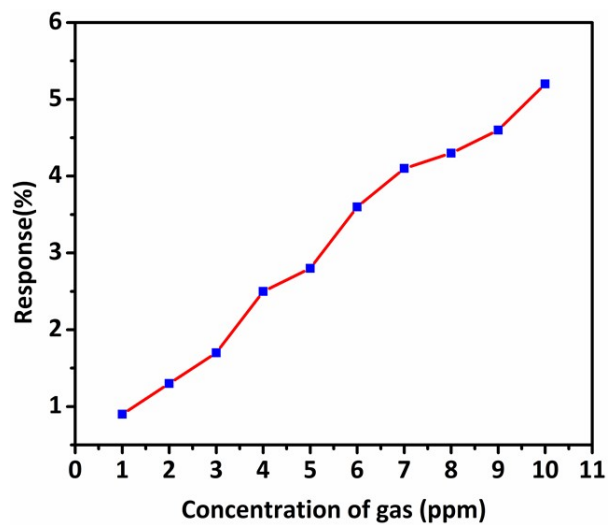

**Figure S6: Sensor response with reference to concentration of CO.**



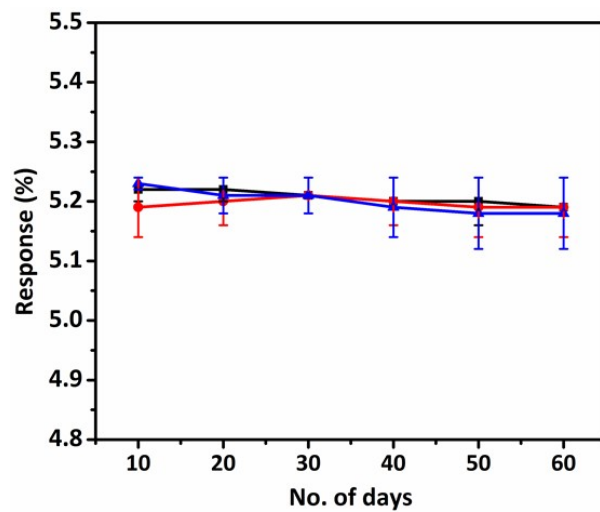

**Figure S7: Sensor stability studies for 3 sensors as a function of time with error calculation.**
